# Supplementary material for: Impacts of the Pandemic, Animal Source Food Retailers’ and Consumers’ Knowledge and Attitudes toward COVID-19, and Their Food Safety Practices in Chiang Mai, Thailand
Source: MDPI journal article supplement (doi:10.3390/ijerph191610187), 2022-08-17
Supplement: s1 [file s1]

**Survey questionnaires [ID.02-Consumers]: Assessing impacts of COVID-19  
pandemic on animal source food retailers and consumers in Thailand  
(English translation)**

**A. Participant Information**

**A1. Gender:**

1. Male
2. Female

**A2. Year of birth:** ..... (e.g. 1980)

**A3. Sub-district:** ..... **District:** .....

**A4. Area:**

1. Urban/Peri-urban
2. Rural

**A5. What is your highest education level:**

1. Illiterate
2. Elementary school
3. Secondary school
4. High school
5. Colleges, university, or higher degrees

**A6. Occupation:**

1. Farmers
2. Government officer/staff
3. Worker
4. Private business
5. Housewife
6. Students
7. Other.....

**A7. What is your monthly family income in the last calendar year?** By average family income -- income from all members in the family from all sources such as wages, self-employment and farming.

|                        |                   |
|------------------------|-------------------|
| 1. ≤ 6,000 THB         | ≤ 200 USD         |
| 2. 6,000 - 12,000 THB  | 200 - 400 USD     |
| 3. 12,000 - 18,000 THB | 400 - 600 USD     |
| 4. 18,000 - 24,000 THB | 600 - 800 USD     |
| 5. 24,000 - 30,000 THB | 800 - 1,000 USD   |
| 6. 30,000 - 60,000 THB | 1,000 - 2,000 USD |
| 7. > 60,000 THB        | > 2,000 USD       |
| 8. Not sure            | Not sure          |

**A8. Number of members who permanently stay in your family:** ..... (*person*)

## B. Impact of COVID-19 to ASF Purchasing and Selection

**B1. At each below period, how often do you purchase ASF types for your home consumption?** (Unit: times per week) <ask all ASF if they consume>

| ASF types<br>(any applicable)   | At the same time last year<br>(before Feb/Mar 2020) |           |           |                  |       |            | During partial lockdown<br>(in weeks of April 2020) |           |           |                  |       |            | At present<br>(from May 2020 to now) |           |           |                  |       |            |
|---------------------------------|-----------------------------------------------------|-----------|-----------|------------------|-------|------------|-----------------------------------------------------|-----------|-----------|------------------|-------|------------|--------------------------------------|-----------|-----------|------------------|-------|------------|
|                                 | Daily                                               | 4-5 times | 2-3 times | One or < 1 times | Never | Don't know | Daily                                               | 4-5 times | 2-3 times | One or < 1 times | Never | Don't know | Daily                                | 4-5 times | 2-3 times | One or < 1 times | Never | Don't know |
| Pork                            |                                                     |           |           |                  |       |            |                                                     |           |           |                  |       |            |                                      |           |           |                  |       |            |
| Poultry<br>(chicken, duck, ...) |                                                     |           |           |                  |       |            |                                                     |           |           |                  |       |            |                                      |           |           |                  |       |            |
| Beef                            |                                                     |           |           |                  |       |            |                                                     |           |           |                  |       |            |                                      |           |           |                  |       |            |
| Fish/seafood                    |                                                     |           |           |                  |       |            |                                                     |           |           |                  |       |            |                                      |           |           |                  |       |            |
| Egg                             |                                                     |           |           |                  |       |            |                                                     |           |           |                  |       |            |                                      |           |           |                  |       |            |
| Any kind of wildlife            |                                                     |           |           |                  |       |            |                                                     |           |           |                  |       |            |                                      |           |           |                  |       |            |

**B2. At each below period, which type of retail(s) have you often purchased ASF for your home consumption?** (time/week)

| ASF types<br>(any applicable) | At the same time last year<br>(before Feb/Mar 2020) |           |           |                  |       |            | During partial lockdown<br>(in weeks of April 2020) |           |           |                  |       |            | At present<br>(from May 2020 to now) |           |           |                  |       |            |
|-------------------------------|-----------------------------------------------------|-----------|-----------|------------------|-------|------------|-----------------------------------------------------|-----------|-----------|------------------|-------|------------|--------------------------------------|-----------|-----------|------------------|-------|------------|
|                               | Daily                                               | 4-5 times | 2-3 times | One or < 1 times | Never | Don't know | Daily                                               | 4-5 times | 2-3 times | One or < 1 times | Never | Don't know | Daily                                | 4-5 times | 2-3 times | One or < 1 times | Never | Don't know |
| Traditional market            |                                                     |           |           |                  |       |            |                                                     |           |           |                  |       |            |                                      |           |           |                  |       |            |
| Wet market                    |                                                     |           |           |                  |       |            |                                                     |           |           |                  |       |            |                                      |           |           |                  |       |            |
| Super market                  |                                                     |           |           |                  |       |            |                                                     |           |           |                  |       |            |                                      |           |           |                  |       |            |
| Convenience store             |                                                     |           |           |                  |       |            |                                                     |           |           |                  |       |            |                                      |           |           |                  |       |            |
| Street vendor                 |                                                     |           |           |                  |       |            |                                                     |           |           |                  |       |            |                                      |           |           |                  |       |            |
| Your own                      |                                                     |           |           |                  |       |            |                                                     |           |           |                  |       |            |                                      |           |           |                  |       |            |
| Online (ship)                 |                                                     |           |           |                  |       |            |                                                     |           |           |                  |       |            |                                      |           |           |                  |       |            |

**B3. At each below period, what is an average amount of ASF type (Kg) have you purchase per shopping time?** (If they don't eat => NA; don't know/don't remember, put "DK")

| ASF types<br>(any applicable)   | At the same time last year<br>(before Feb/Mar 2020) | During partial lockdown<br>(in weeks of April 2020) | At present<br>(from May 2020 to now) |
|---------------------------------|-----------------------------------------------------|-----------------------------------------------------|--------------------------------------|
| Pork                            | .....                                               | .....                                               | .....                                |
| Poultry<br>(chicken, duck, ...) | .....                                               | .....                                               | .....                                |
| Beef                            | .....                                               | .....                                               | .....                                |
| Fish/seafood                    | .....                                               | .....                                               | .....                                |
| Egg*                            | .....                                               | .....                                               | .....                                |
| Any kind of wildlife            | .....                                               | .....                                               | .....                                |

\*Number of eggs/time (chicken, duck eggs)

**B4. At present (from May 2020 to now), How easy for you to buy ASF at the time of COMPARED to before COVID-19 or at the same time last year? (before Feb/Mar 2020)**

| ASF types                    | Easier | No change/normal | More difficult | Don't know |
|------------------------------|--------|------------------|----------------|------------|
| Pork                         |        |                  |                |            |
| Poultry (chicken, duck, ...) |        |                  |                |            |
| Beef                         |        |                  |                |            |
| Fish/seafood                 |        |                  |                |            |
| Egg                          |        |                  |                |            |
| Any kind of wildlife         |        |                  |                |            |

**B5. During partial lockdown (in weeks of April 2020), How easy for you to buy ASF at the time of COMPARED to before COVID-19 or at the same time last year? (before Feb/Mar 2020)**

| ASF types                    | Easier | No change/normal | More difficult | Don't know |
|------------------------------|--------|------------------|----------------|------------|
| Pork                         |        |                  |                |            |
| Poultry (chicken, duck, ...) |        |                  |                |            |
| Beef                         |        |                  |                |            |
| Fish/seafood                 |        |                  |                |            |
| Egg*                         |        |                  |                |            |
| Any kind of wildlife         |        |                  |                |            |

\* Number of eggs/time (chicken, duck egg, ...)

### C. Impact of COVID-19 to Consumer's Job and Livelihood

**C1. Did COVID-19 impact to your business/job/work/employment?**

1. Yes, increase (→ C2, C4, C5)
2. Yes, decrease (→ C2, C3, C5)
3. No (Move to → C5)
4. Don't know (Move to → C5)

**C2. If Yes, how much has your income/salary increased/decreased?**

1. All or nearly all (90-100%)
2. More than half of it (60-90%)
3. About half of it (40-60%)
4. Less than half of it (10-40%)
5. A small amount (1-10%)
6. Don't know / no answer

**C3. What has caused decreased income your business/job?**

1. Reduced mobility / enforced lockdown
2. Increased duty of care on children or sick
3. Reduced work time
4. Loss job
5. Other (specify): .....
6. Don't know / no answer

**C4. What has caused increased income your business/job? .....**

**C5. Think back before, during the COVID-19 periods and this time**

| Items                                                                                                                             | At the same time<br>last year<br>(before Feb/Mar 2020) |    |               | During partial<br>lockdown<br>(in weeks of April 2020) |    |               | At present<br>(from May 2020 to now) |    |               |
|-----------------------------------------------------------------------------------------------------------------------------------|--------------------------------------------------------|----|---------------|--------------------------------------------------------|----|---------------|--------------------------------------|----|---------------|
|                                                                                                                                   | Yes                                                    | No | Don't<br>know | Yes                                                    | No | Don't<br>know | Yes                                  | No | Don't<br>know |
| 1. You or others in the household were worried about not having enough food to eat because of a lack of money or other resources? |                                                        |    |               |                                                        |    |               |                                      |    |               |
| 2. You or others in your household were unable to eat healthy and nutritious food because of a lack of money or other resources?  |                                                        |    |               |                                                        |    |               |                                      |    |               |
| 3. You or others in your household ate only a few kinds of foods because of a lack of money or other resources to get food?       |                                                        |    |               |                                                        |    |               |                                      |    |               |
| 4. You or others in your household had to skip a meal because there was not enough money or other resources to get food?          |                                                        |    |               |                                                        |    |               |                                      |    |               |
| 5. You or others in your household ate less than you thought you should because of a lack of money or other resources?            |                                                        |    |               |                                                        |    |               |                                      |    |               |
| 6. Your household ran out of food because of a lack of money or other resources?                                                  |                                                        |    |               |                                                        |    |               |                                      |    |               |
| 7. You or others in your household were hungry but did not eat because there was not enough money or other resources for food?    |                                                        |    |               |                                                        |    |               |                                      |    |               |
| 8. You or others in your household went without eating for a whole day because of a lack of money or other resources?             |                                                        |    |               |                                                        |    |               |                                      |    |               |

**D. KAP on COVID-19 and Prevention Measures****D1. Have you heard about COVID-19 and its pathogen?**

1. Yes, due to virus
2. Yes, due to bacteria
3. Yes, due to parasite/protozoan
4. Yes, but don't know which pathogen
5. Neither heard about the disease nor know its pathogen

**D2. How do you think COVID-19 spreads?**

| Content                                                                          | Very<br>likely | Possible, but<br>not so likely | Not<br>possible | Don't<br>know |
|----------------------------------------------------------------------------------|----------------|--------------------------------|-----------------|---------------|
| 1. Through air                                                                   |                |                                |                 |               |
| 2. Animal contact                                                                |                |                                |                 |               |
| 3. Through vector borne (insects: mosquitos, flies...)                           |                |                                |                 |               |
| 4. From a person who is sneezing and coughing                                    |                |                                |                 |               |
| 5. From touching surfaces/objects with respiratory droplets from infected people |                |                                |                 |               |
| 6. From eating livestock products                                                |                |                                |                 |               |
| 7. From eating wildlife products                                                 |                |                                |                 |               |
| 8. From contacting healthy people                                                |                |                                |                 |               |

**D3. What do you think is important to stop the spread of the disease?**

| Content                                                                            | Very important | Little important | Not important | Don't know |
|------------------------------------------------------------------------------------|----------------|------------------|---------------|------------|
| 1. Only staying at home                                                            |                |                  |               |            |
| 2. Not meeting with strangers                                                      |                |                  |               |            |
| 3. Avoid eating wildlife                                                           |                |                  |               |            |
| 4. Avoid eating any animal sourced food                                            |                |                  |               |            |
| 5. Avoid eating any raw products (salad, fruit)                                    |                |                  |               |            |
| 6. Washing hands frequently                                                        |                |                  |               |            |
| 7. Covering your mouth and nose while sneezing and coughing                        |                |                  |               |            |
| 8. Avoid contact with people if you are having any symptoms                        |                |                  |               |            |
| 9. Wear a mask when going out of the house                                         |                |                  |               |            |
| 10. Do social distancing when going out of the house                               |                |                  |               |            |
| 11. Keeping people in quarantine after they returned from risky areas              |                |                  |               |            |
| 12. Keeping those people in quarantine who were in contact with an infected person |                |                  |               |            |

**D4. What are you doing to stop the disease yourself?**

| Content                                                     | I try to do this as much as possible | I do this sometimes | I do not do this | Not applicable |
|-------------------------------------------------------------|--------------------------------------|---------------------|------------------|----------------|
| 1. Only staying at home                                     |                                      |                     |                  |                |
| 2. Not meeting with strangers                               |                                      |                     |                  |                |
| 3. Avoid eating wildlife                                    |                                      |                     |                  |                |
| 4. Avoid eating any animal sourced food                     |                                      |                     |                  |                |
| 5. Avoid eating any raw products (salad, fruit)             |                                      |                     |                  |                |
| 6. Washing hands frequently                                 |                                      |                     |                  |                |
| 7. Covering your mouth and nose while sneezing and coughing |                                      |                     |                  |                |
| 8. Avoid contact with people if you are having any symptoms |                                      |                     |                  |                |
| 9. Wear a mask when going out of the house                  |                                      |                     |                  |                |
| 10. Do social distancing when going out of the house        |                                      |                     |                  |                |

## E. Food Safety Practices and Behaviors

### E1. Before or during COVID-19 periods, how often do you do practices as below?

| Practices<br>(any applicable)                                 | At the same time<br>last year<br>(before Feb/Mar 2020) |       |               |        |       | During partial<br>lockdown<br>(in weeks of April 2020) |       |               |        |       | At present<br>(from May 2020 to now) |       |               |        |       |
|---------------------------------------------------------------|--------------------------------------------------------|-------|---------------|--------|-------|--------------------------------------------------------|-------|---------------|--------|-------|--------------------------------------|-------|---------------|--------|-------|
|                                                               | Very<br>often                                          | Often | Some<br>times | Rarely | Never | Very<br>often                                          | Often | Some<br>times | Rarely | Never | Very<br>often                        | Often | Some<br>times | Rarely | Never |
| 1. Seeking ASF with proved quality check and clear origin     |                                                        |       |               |        |       |                                                        |       |               |        |       |                                      |       |               |        |       |
| 2. Wash your ASF carefully before cooking                     |                                                        |       |               |        |       |                                                        |       |               |        |       |                                      |       |               |        |       |
| 3. Frequency of eaten rare or undercook ASF                   |                                                        |       |               |        |       |                                                        |       |               |        |       |                                      |       |               |        |       |
| 4. Frequency of washing kitchen equipment after preparing ASF |                                                        |       |               |        |       |                                                        |       |               |        |       |                                      |       |               |        |       |
| 5. Frequency of washing your hands after preparing ASF        |                                                        |       |               |        |       |                                                        |       |               |        |       |                                      |       |               |        |       |
| 6. Using separate kitchen utensils for raw and cooked ASF     |                                                        |       |               |        |       |                                                        |       |               |        |       |                                      |       |               |        |       |
| 7. Wearing gloves when you prepare raw ASF                    |                                                        |       |               |        |       |                                                        |       |               |        |       |                                      |       |               |        |       |
| 8. Disinfection hands after returning home from going out     |                                                        |       |               |        |       |                                                        |       |               |        |       |                                      |       |               |        |       |

### E2. Food safety perception and behavior - What is your opinion about below statements?

| Items on food safety perception                                                    | Strongly<br>agree | Agree | Neutral | Disagree | Strongly<br>disagree | Don't<br>know |
|------------------------------------------------------------------------------------|-------------------|-------|---------|----------|----------------------|---------------|
| 1. I am looking for a good hygiene practice shop to buy ASF                        |                   |       |         |          |                      |               |
| 2. I expect sellers to use a mask when selling ASF                                 |                   |       |         |          |                      |               |
| 3. I expect sellers to use a glove when selling ASF                                |                   |       |         |          |                      |               |
| 4. Washing/cleaning kitchen equipment, facilities frequency reduces my health risk |                   |       |         |          |                      |               |
| 5. Washing and disinfection frequently hands reduce my health risk                 |                   |       |         |          |                      |               |
| 6. Food inspection for quality and safety by authorities is necessary              |                   |       |         |          |                      |               |
| 7. Shop sellers wear mask during selling is to hide their health problem           |                   |       |         |          |                      |               |
| 8. Shop sellers wear gloves during selling is to hide their health problem         |                   |       |         |          |                      |               |
| 9. I avoid eating raw or undercooked ASF                                           |                   |       |         |          |                      |               |

**Thank for your participation!**
